# Supplementary material for: Vibrational spectra of calcium, strontium and barium valproates. Self-assembly of valproate nanostrands in aqueous solution and in the solid state
Source: Royal Society of Chemistry journal article supplement (doi:10.1039/c000488j), 2010-01-01
Supplement: c000488j.pdf [file c000488j.pdf]

# Supplementary Information

## **Vibrational Spectra of Calcium, Strontium and Barium Valproates. Self-Assembly of Valproate Nanostrands in Aqueous Solution and in the Solid State**

Panče Naumov,<sup>\*a,b</sup> Gjorgji Petruševski<sup>b,‡</sup> and Gligor Jovanovski<sup>b</sup>

<sup>a</sup>*Department of Material and Life Science, Graduate School of Engineering, Osaka University,  
2-1 Yamada-oka, Suita 565-0871, Osaka, Japan. E-mail: npance@wakate.frc.eng.osaka-u.ac.jp;  
Fax: +81 6 6879 4726; Tel: +81 6 6879 4574*

<sup>b</sup>*Institute of Chemistry, Faculty of Science, SS Cyril and Methodius University, Arhimedova 5,  
MK-1000 Skopje, Macedonia*

<sup>‡</sup>*Present address: Research & Development Institute, Alkaloid AD, Aleksandar Makedonski 12,  
MK-1000 Skopje, Macedonia*

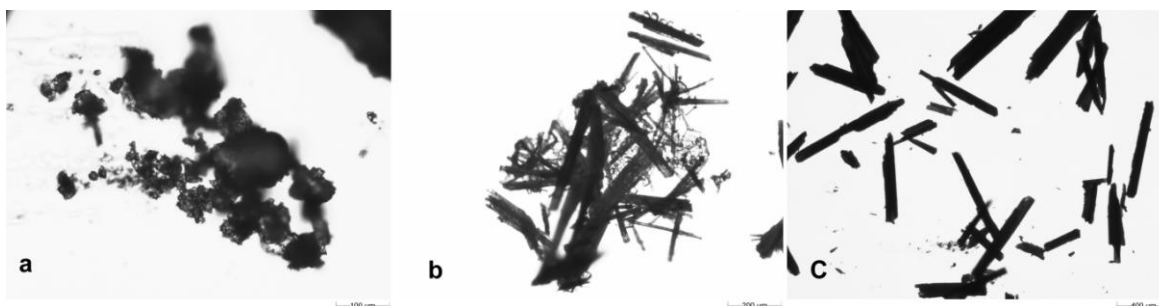

**Figure S1. 1.** Optical microscopy images of the valproates of calcium (a), strontium (b) and barium (c).

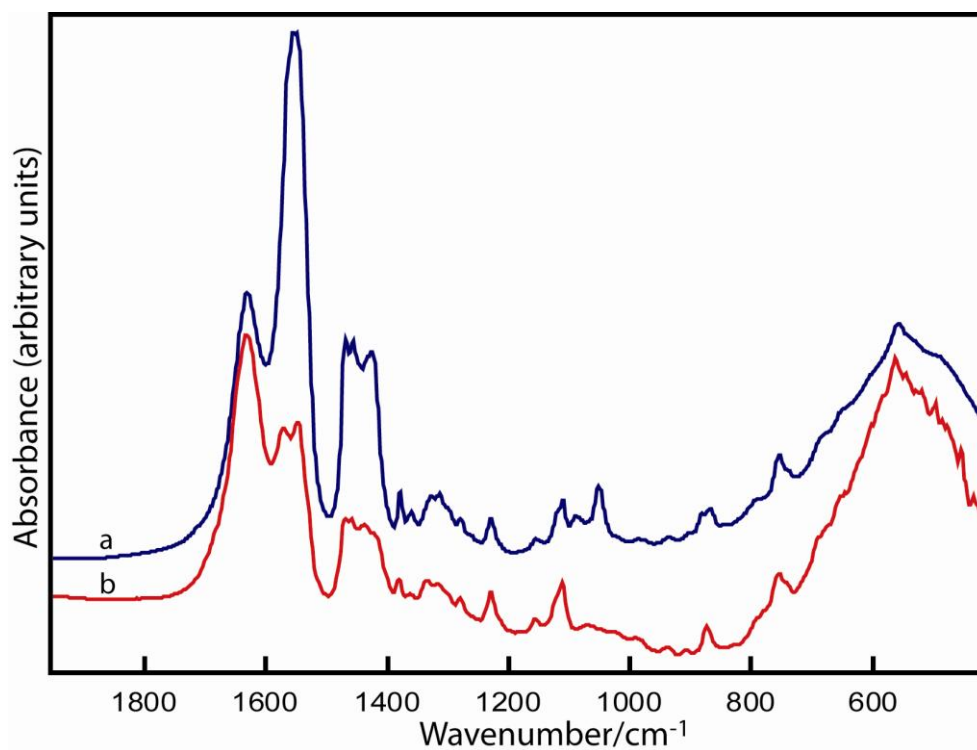

**Figure S2.** Fingerprint region in the FT-IR spectra of calcium valproate: native (a) and after heating at 50 °C for 4 hours (b).

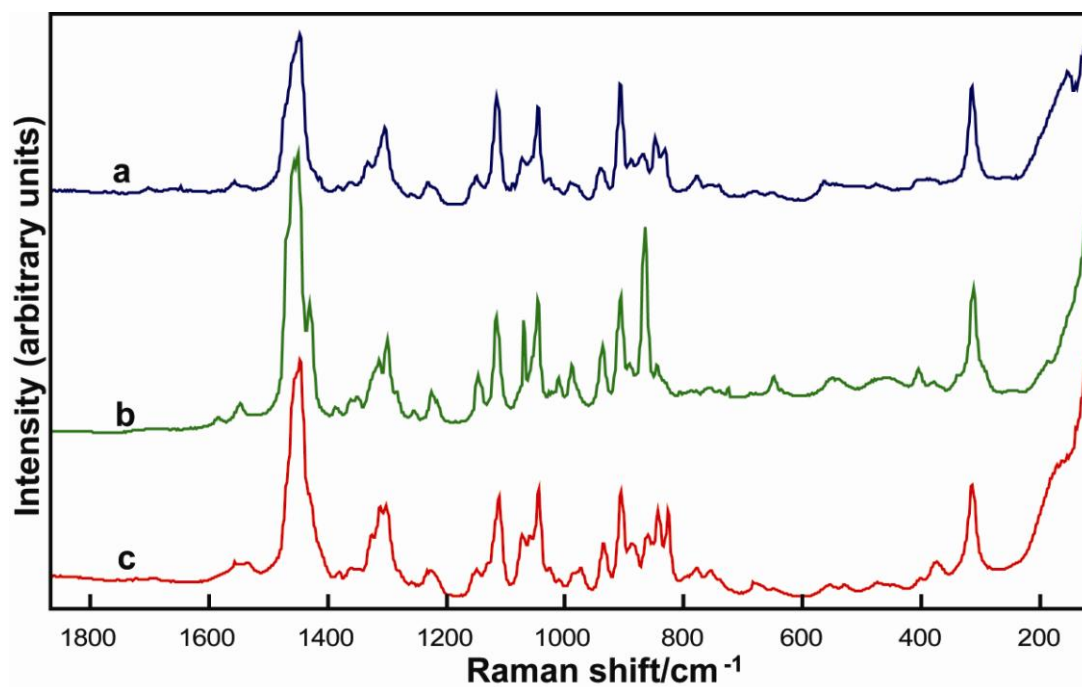

**Figure S3.** Lower frequency region in the Raman spectra of the valproates of calcium (a), strontium (b) and barium (c).

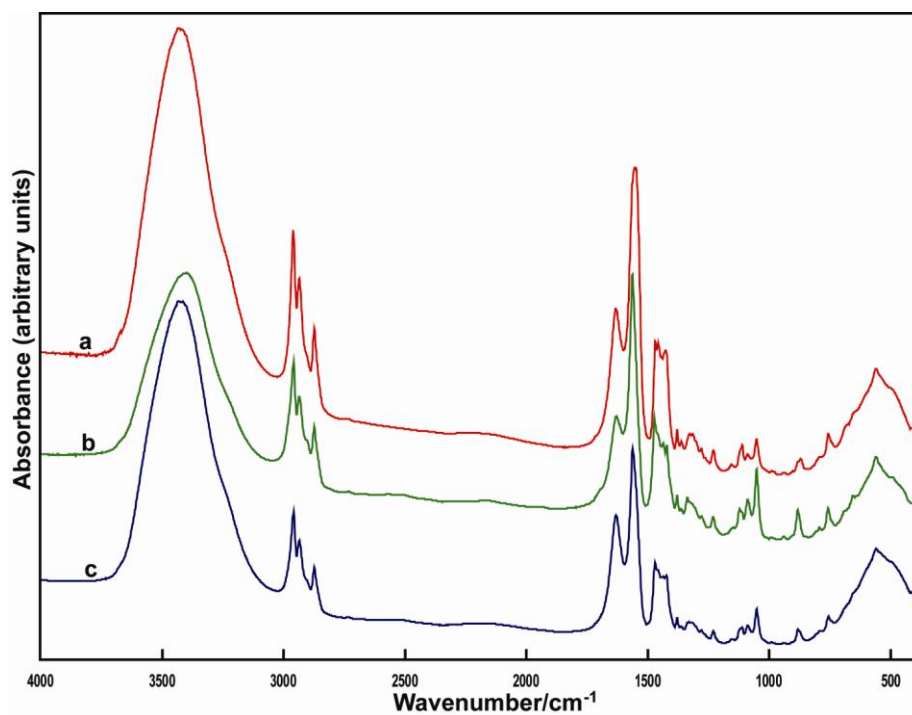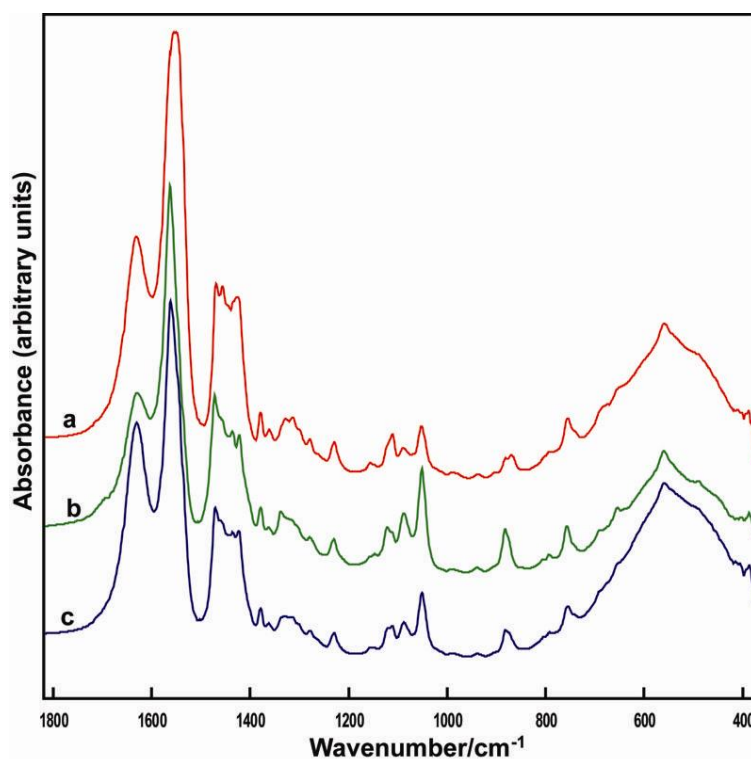

**Figure S4.** Comparison of the FT-IR spectra of the as-obtained CaVal (a) and the recrystallized samples from: ethanol (b) and acetone (c).

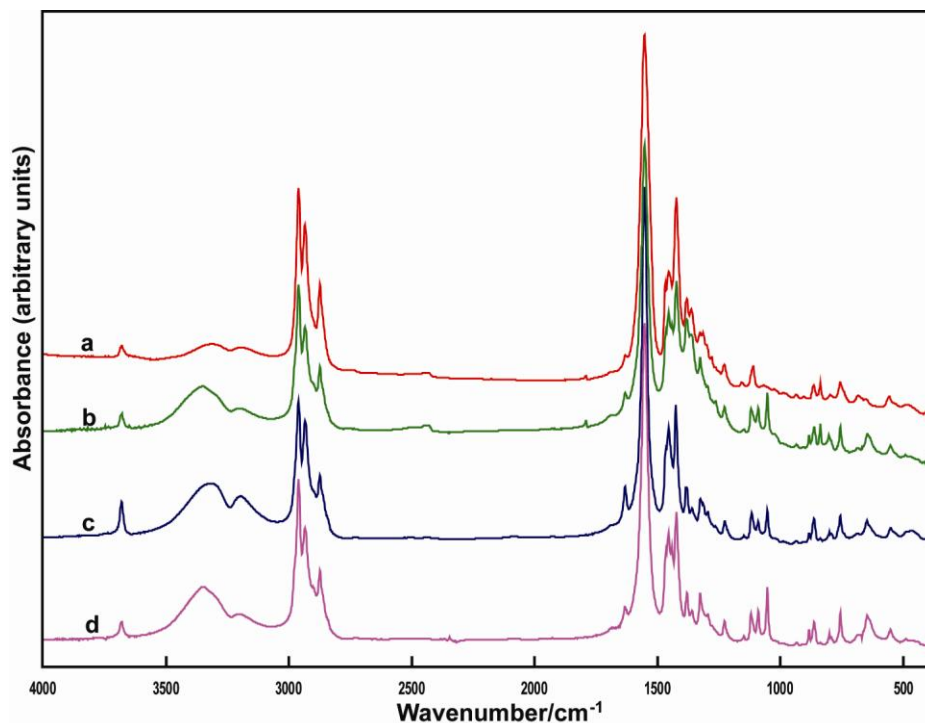

**Figure S5.** Comparison of the FT-IR spectra of the as-obtained SrVal (a) and the recrystallized samples from: ethanol (b), acetone (c) and ethyl acetate (c).

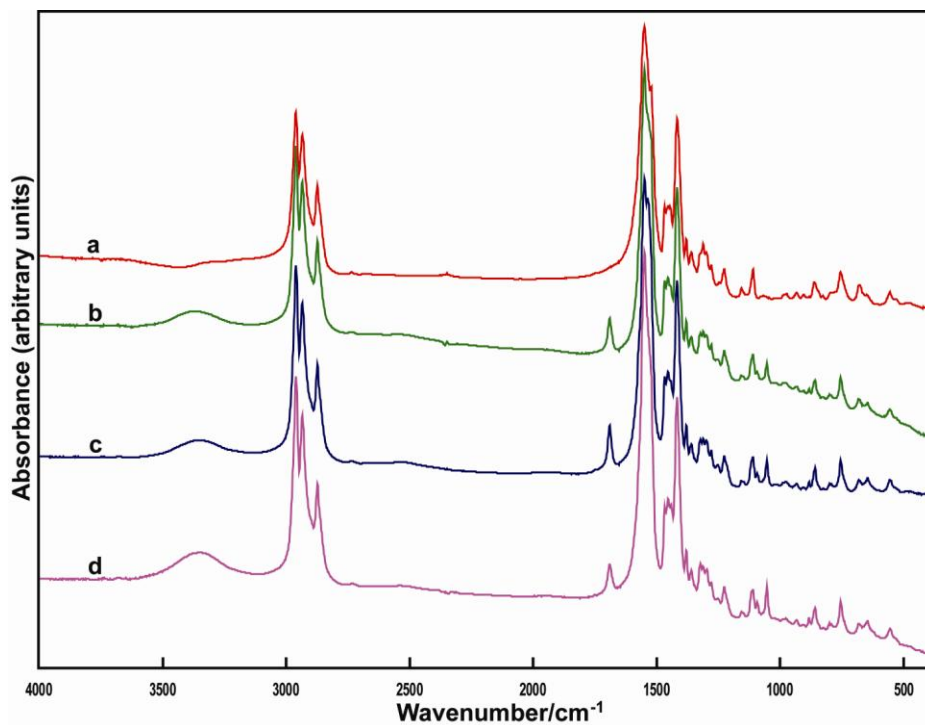

**Figure S6.** Comparison of the FT-IR spectra of the as-obtained BaVal (a) and the recrystallized samples from: ethanol (b), acetone (c) and ethyl acetate (c).
